# Supplementary material for: The Chromosomal-Boundary Paradox of Processed Pseudogene Annotation in the T2T Era
Source: Research Square preprint supplement (doi:10.21203/rs.3.rs-7991770/v1), 2025-11-11
Supplement: Supplementary file 1 [file 2e91745ef19793b7534f6bf2.xlsx]

## Sheet: Sheet1
	HGNC Symbol	Gene ID	gene type	Chromosomal location	Chromosomal location type	Co-mobilized loci	Cytoband
	CICP1	ENSG00000233652.1	processed_pseudogene	chrY:25384992-25391811	Interstitial	LINC00265-3P	Yq11.23
	CICP2	ENSG00000233740.1	processed_pseudogene	chrY:24274337-24281140	Interstitial	LINC00265-2P, SEPTIN14P22	Yq11.23
	CICP3	ENSG00000229376.3	processed_pseudogene	chr1:70092-706903	Subtelomeric	SEPTIN14P14	1p36.33
	CICP4	ENSG00000232852.1	processed_pseudogene	chr20:64286187-64292998	Subtelomeric	x	20q13.33
	CICP5	ENSG00000233771.2	unprocessed_pseudogene	chr1:223943605-223950416	Interstitial	SEPTIN14P15	1q42.11
	CICP6	ENSG00000230304.1	processed_pseudogene	chr3:198219497-198226310	Subtelomeric	SEPTIN14P3	3q29
	CICP7	ENSG00000233653.3	transcribed_processed_pseudogene	chr1:465101-489906	Subtelomeric	SEPTIN14P13	1p36.33
	CICP8	ENSG00000225371.1	processed_pseudogene	chr7:56358458-56365270	Pericentromeric	SEPTIN14P24	7p11.2
	CICP9	ENSG00000228882.1	processed_pseudogene	chr10:38448987-38455365	Centromeric	SEPTIN14P10	10p11.1
	CICP10	ENSG00000224160.1	processed_pseudogene	chr2:242115856-242120053	Subtelomeric	SEPTIN14P2	2q37.3
	CICP11	ENSG00000237799.2	processed_pseudogene	chr7:55732779-55739605	Pericentromeric	x	7q11.2
	CICP12	ENSG00000225270.1	processed_pseudogene	chr7:55794034-55798876	Pericentromeric	SEPTIN14 (Parental gene)	7p11.2
	CICP13	ENSG00000234419.1	processed_pseudogene	chr1:222464094-222470882	Interstitial	x	1q41
	CICP14	ENSG00000281490.1	processed_pseudogene	chr7:128651962-128658791	Interstitial	x	7q32.1
	CICP15	ENSG00000274553.1	processed_pseudogene	chr5:181325049-181331839	Subtelomeric	SEPTIN14P5	5q35.3
	CICP16	ENSG00000248213.3	processed_pseudogene	chr4:118631970-118638782	Interstitial	SEPTIN14P4	4q26
	CICP17	ENSG00000227233.1	processed_pseudogene	chr7:51378284-51384660	Interstitial	x	7p12.1
	CICP19	ENSG00000282059.1	processed_pseudogene	chr19:189239-195595	Subtelomeric	SEPTIN14P6	6p25.3
	CICP20	ENSG00000235955.1	processed_pseudogene	chr7:45812216-45819016	Subtelomeric	SEPTIN14P19	19p13.3
	CICP21	ENSG00000278455.1	processed_pseudogene	chr1:243045782-243051619	Subtelomeric	SEPTIN14P7	19p13.3
	CICP22	ENSG00000226220.1	processed_pseudogene	chr7:39792593-39797911	Interstitial	SEPTIN14P21	1q43
	CICP23	ENSG00000270921.1	processed_pseudogene	chr11:119312-126123	Interstitial	-	7p14.1
	CICP24	ENSG00000271466.1	processed_pseudogene	chr7:63764257-63771047	Subtelomeric	SEPTIN14P11	11p15.5
	CICP25	ENSG00000277349.1	unprocessed_pseudogene	chr16:90170062-90175865	Pericentromeric	-	7q11.21
	CICP26	ENSG00000233003.4	unprocessed_pseudogene	chr1:227971390-227978193	Subtelomeric	SEPTIN14P16	16q24.3
	CICP27	ENSG00000233750.3	processed_pseudogene	chr1:127025-134836	Interstitial	SEPTIN14P17	1q42.13
	CICP28	ENSG00000277253.1	processed_pseudogene	chr7:56801336-56808148	Subtelomeric	SEPTIN14P18	1p36.33
